# Supplementary material
Source: publisher figshare collection journal article supplement (https://karger.figshare.com/ndownloader/files/14074580)

## Supplementary data

**Supplementary Figure 1.** Probability of having died at ages 40 to 99 for high and low income groups by sex. Top 20 percent income versus bottom 20 percent income groups.

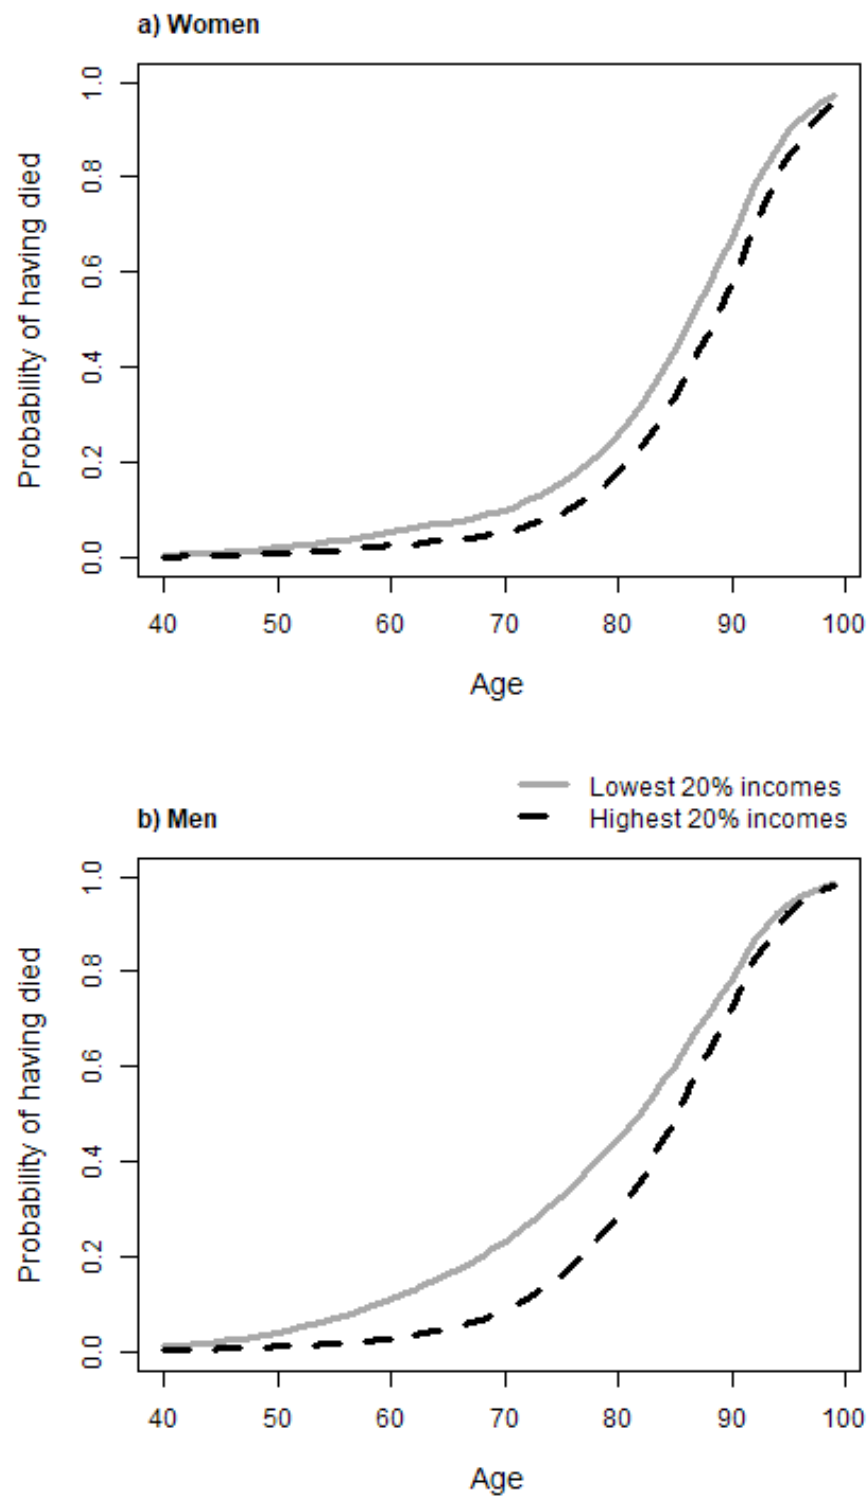

**Supplementary Figure 2.** Risk ratio (relative difference) and percentage point differences (absolute difference) in probability of having died in low versus high-income group at ages 40 to 99 by sex. Top 20 percent income versus bottom 20 percent income groups.

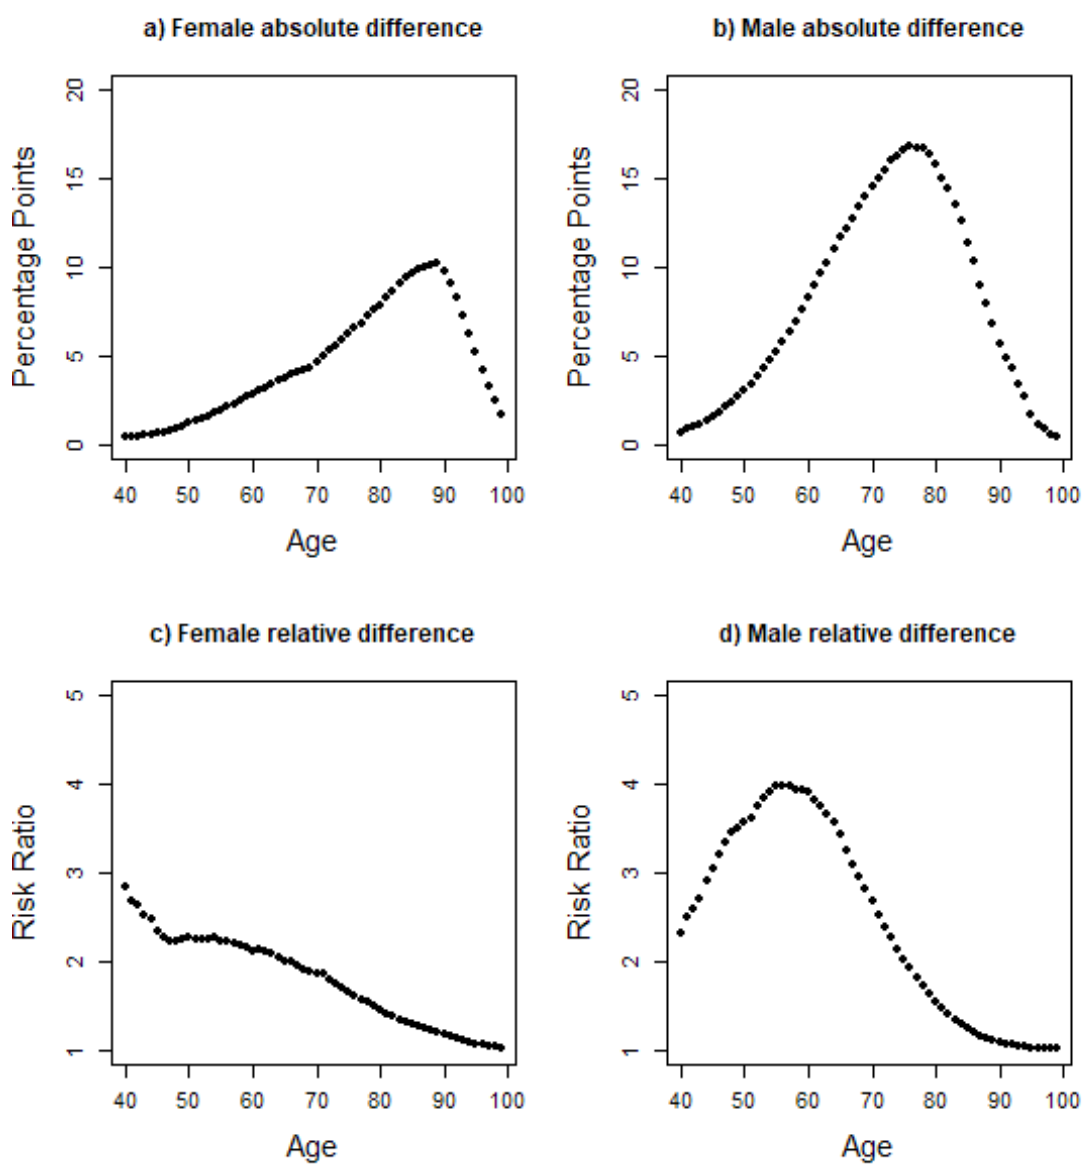

**Supplementary Figure 3.** Probability of having died at ages 40 to 99 for high and low income groups by sex. Top 30 percent income versus bottom 30 percent income groups.

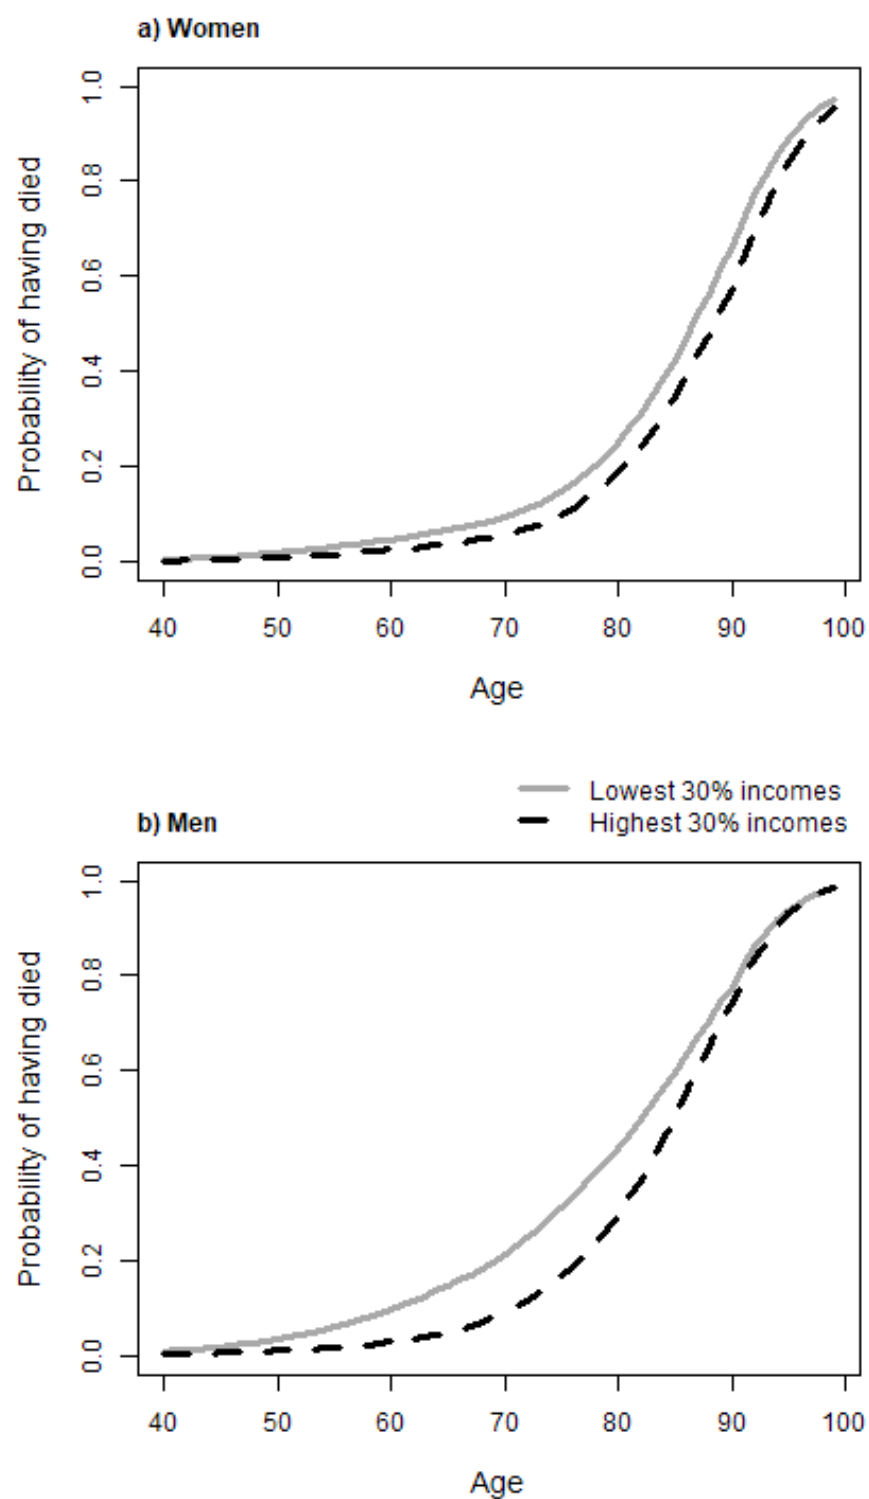

**Supplementary Figure 4.** Risk ratio (relative difference) and percentage point differences (absolute difference) in probability of having died in low versus high-income group at ages 40 to 99 by sex. Top 30 percent income versus bottom 30 percent income groups.

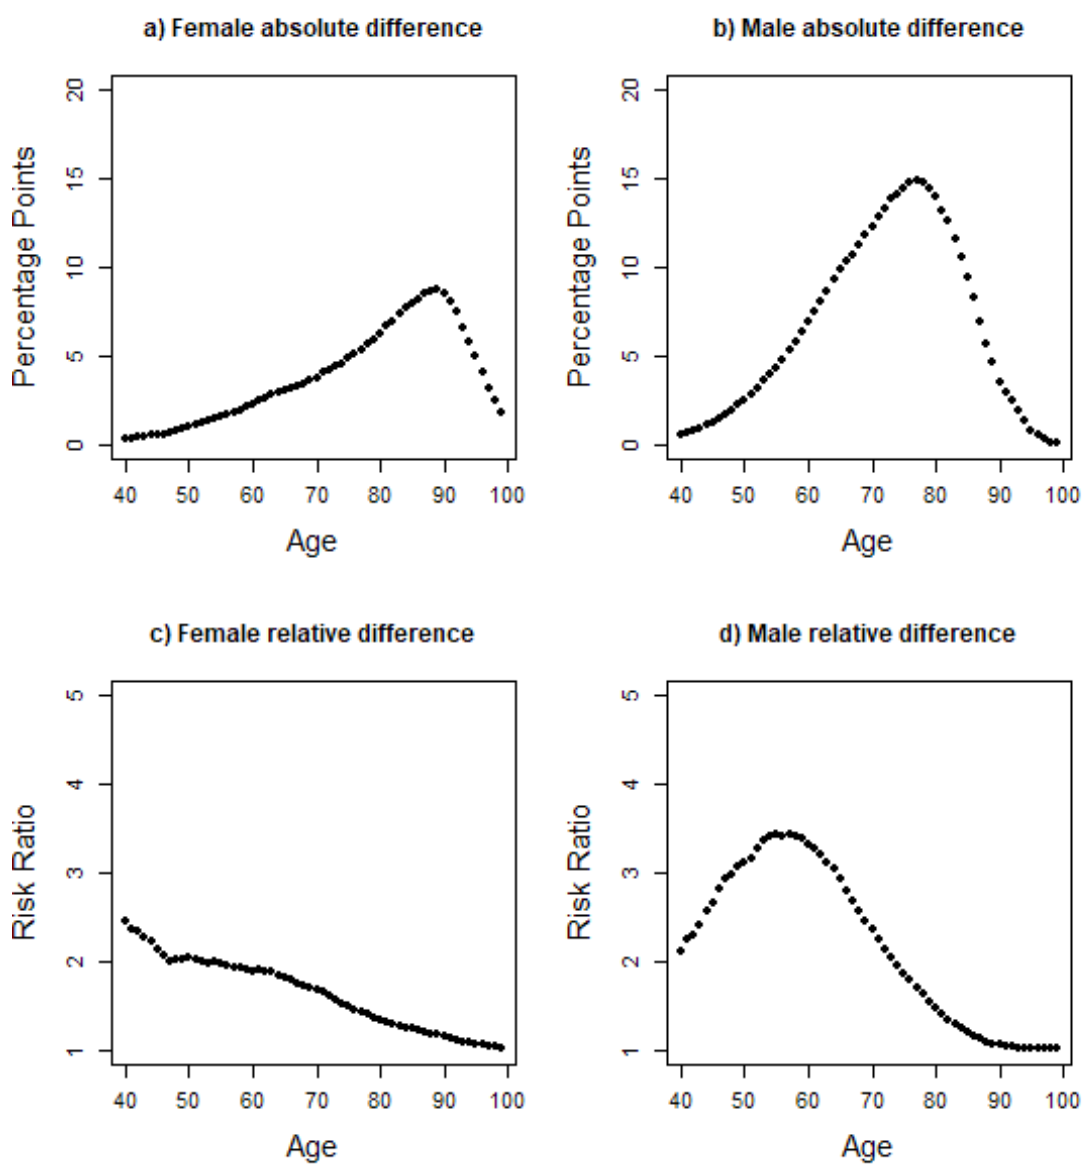

Supplement: Supplementary file 1 [file 14074580]
